# Supplementary material for: Resistive Switching of Sub-10 nm TiO2 Nanoparticle Self-Assembled Monolayers
Source: PubMed Central journal article supplement (PMC5707587; doi:10.3390/nano7110370), 2017-11-04
Supplement: nanomaterials-07-00370-s001.pdf [file nanomaterials-07-00370-s001.pdf]

# Resistive Switching of sub-10 nm TiO<sub>2</sub> Nanoparticle Self-Assembled Monolayers

Dirk Oliver Schmidt <sup>1,2</sup>, Nicolas Raab <sup>3,4</sup>, Michael Noyong <sup>1,2</sup>, Venugopal Santhanam <sup>5</sup>, Regina Dittmann <sup>3,4</sup> and Ulrich Simon <sup>1,2,\*</sup>

## Supporting Information

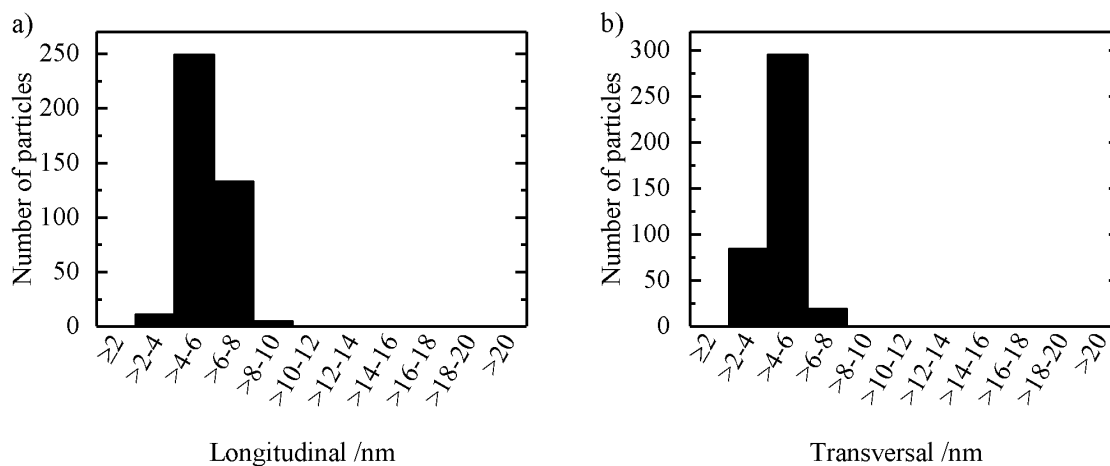

**Figure S1.** Histograms of the synthesized TiO<sub>2</sub> NPs' longitudinal and transversal (a, b).

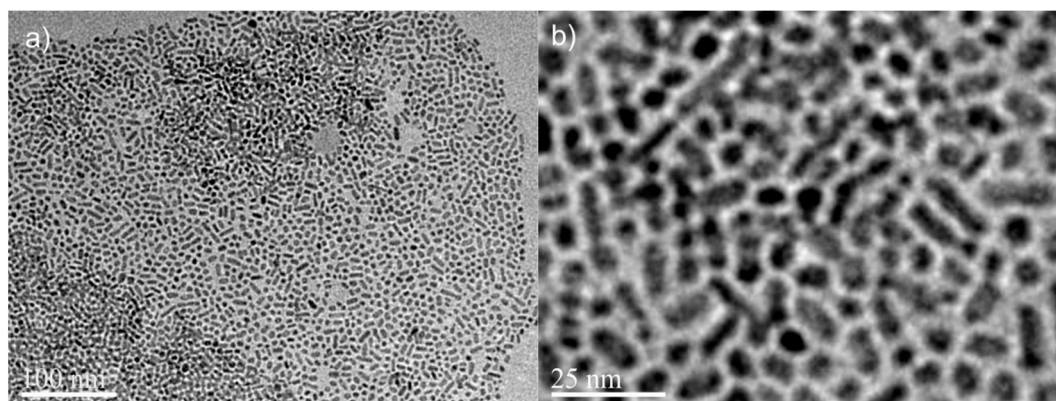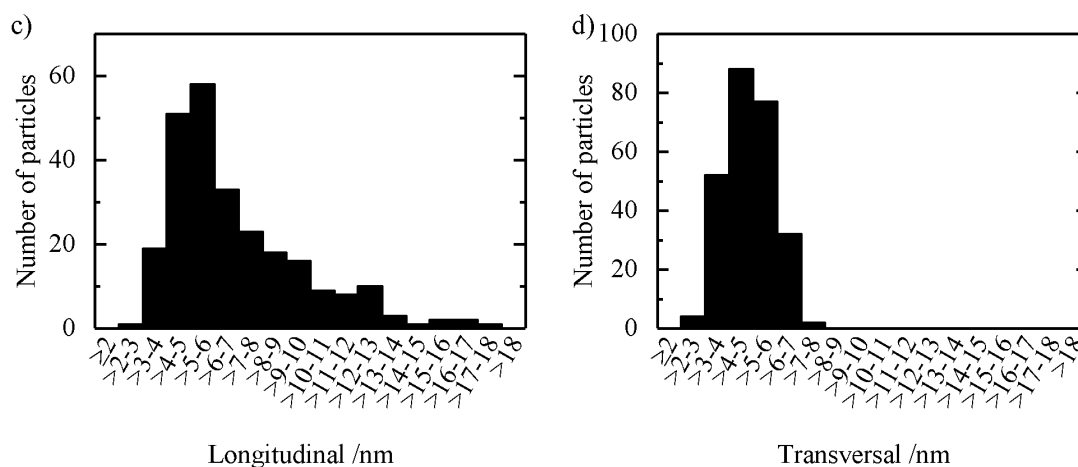

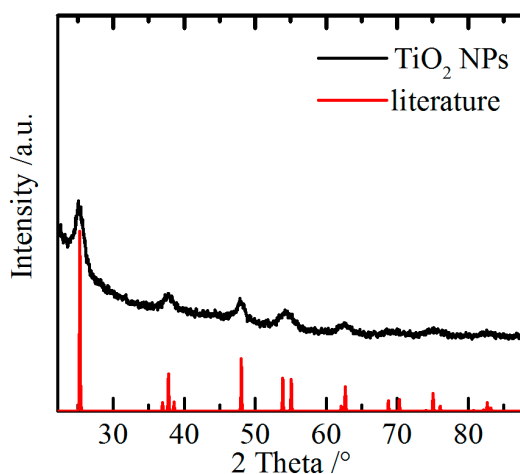

**Figure S2.** Exemplary TEM images of the synthesized TiO<sub>2</sub> NPs (a, b) and corresponding histograms of NPs' longitudinal ( $7.9 \pm 2.2$ ) nm and transversal ( $4.8 \pm 0.8$ ) nm (c, d), resulting in a mean particle diameter of ( $6.3 \pm 1.9$ ) nm. Powder XRD patterns of the NPs (black) and literature anatase data (red) (e) [38].

A self-assembled TiO<sub>2</sub> NP film was formed consisting of particles with a mean longitudinal of ( $9.5 \pm 1.1$ ) nm and mean transversal of ( $7.5 \pm 0.9$ ) nm and a spherical NP to non-spherical shaped NP ratio of 13:1. For TEM investigations, a small part of the self-assembled NP film was transferred onto a carbon coated TEM grid. The images revealed that mono-, bi- and multilayers were present as well as voids without any NPs (Figure S 3). For the one-step transfer method, the Pt/Ir substrate was gently brought into contact with the self-assembled film floating on the water surface (see Figure 2 d I and II in the main text) as compared the carbon grid. After evaporation of water residues, the TiO<sub>2</sub> NP film on the Pt/Ir surface was analyzed *via* AFM. As in the TEM images void spaces without any NP films were discernible in AFM images and multiple layers with various height differences were visible on the Pt/Ir surface (Figure S 4 c, d). A height profile was recorded along the white line in Figure S 4 d revealing a stepwise variation in height of approximately 8 nm. This height difference corresponds to the mean dimensions of the TiO<sub>2</sub> NPs of the mean longitudinal ( $9.5 \pm 1.1$ ) nm and mean transversal ( $7.5 \pm 0.9$ ) nm. Therefore, we assume that the first height step corresponds to a TiO<sub>2</sub> NP monolayer, the second step to a TiO<sub>2</sub> bilayer and so on.

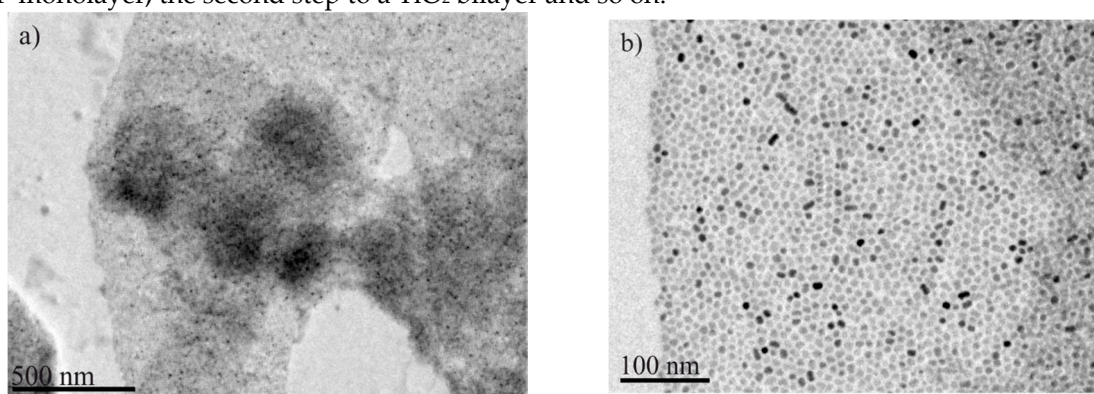

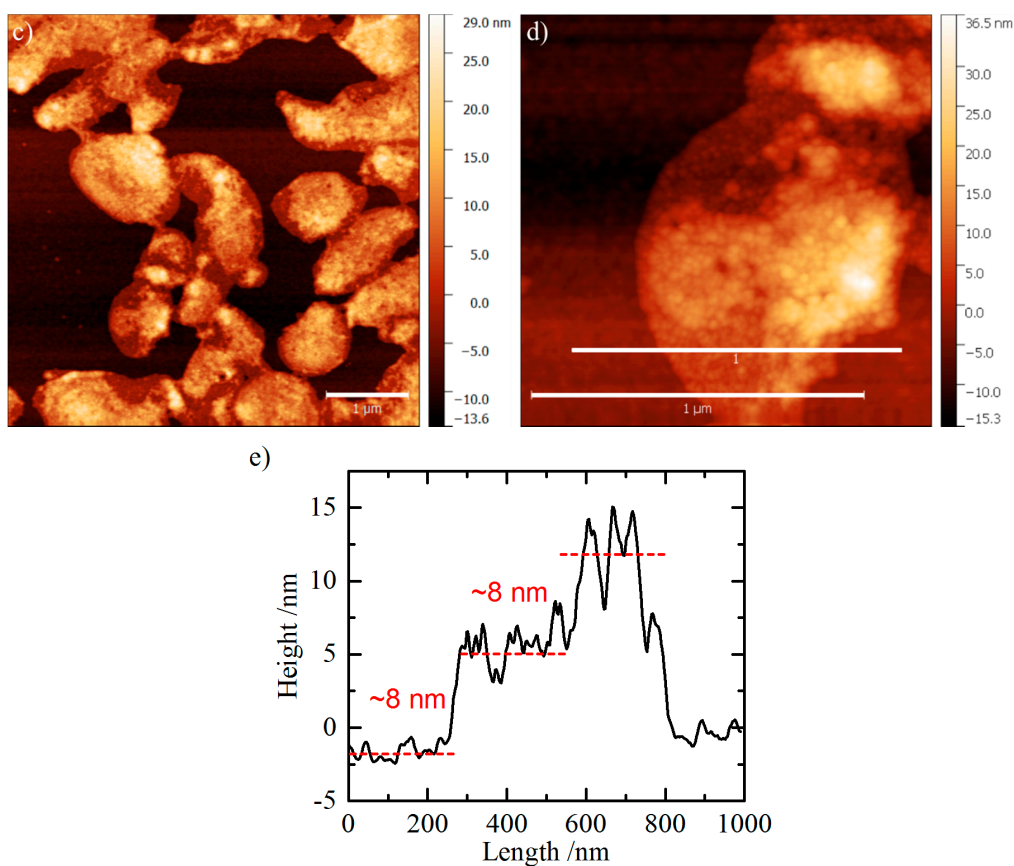

**Figure S3.** Exemplary TEM images of the self-assembled TiO<sub>2</sub> NP film (a, b). Tapping mode AFM images of the TiO<sub>2</sub> NP film transferred to a Pt/Ir surface by the one-step method. (c, d). Corresponding height profile (e) taken along the white line in (d) showing height differences of approximately 8 nm.

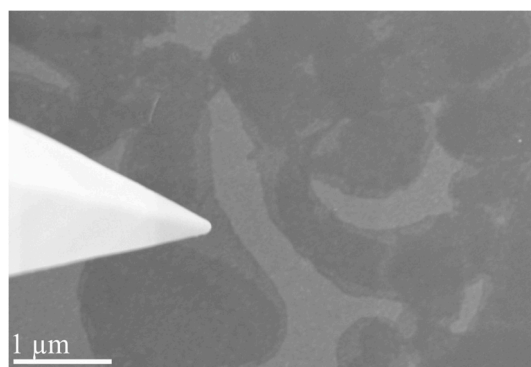

**Figure S4.** SEM image without enhanced contrast of a TiO<sub>2</sub> NP film on the Pt/Ir surface and on the left-hand side the Pt/Ir coated tip electrode is visible.

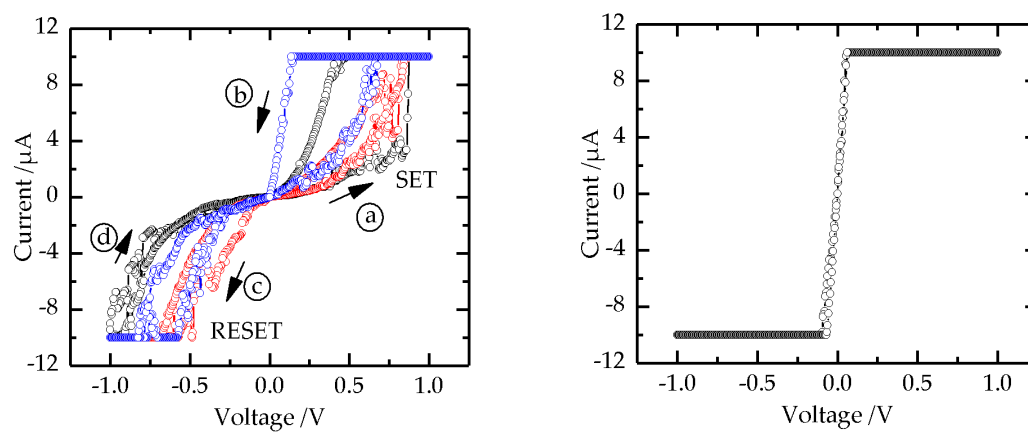

**Figure S5.** Three consecutive switching cycles recorded on a  $\text{TiO}_2$  NP monolayer (a) and subsequent permanent LRS (b).

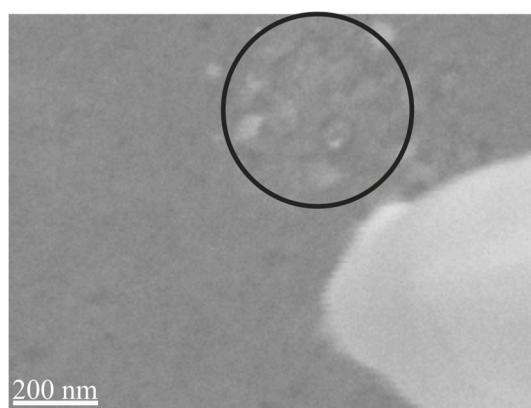

**Figure S6.** SEM image of a  $\text{TiO}_2$  NP layer after a SET process. The tip was lifted off the  $\text{TiO}_2$  NP layer, revealing a morphology change of the layer.
